# Supplementary material for: Effects of an EPS Biosynthesis Gene Cluster of Paenibacillus polymyxa WLY78 on Biofilm Formation and Nitrogen Fixation under Aerobic Conditions
Source: PubMed Central journal article supplement (PMC7911366; doi:10.3390/microorganisms9020289), 2021-01-30
Supplement: microorganisms-09-00289-s001.pdf [file microorganisms-09-00289-s001.pdf]

## Supplementary materials:

**Table S1.** Bacterial strains and plasmids used in this study.

| Strain or plasmid | Description                                                                                                                                  | Source             |
|-------------------|----------------------------------------------------------------------------------------------------------------------------------------------|--------------------|
|                   | <i>Paenibacillus polymyxa</i>                                                                                                                |                    |
| WLY78             | Wild-type strain                                                                                                                             | Laboratory stock   |
| $\Delta pep-1$    | <i>pep-1</i> in-frame deletion mutant                                                                                                        | This study         |
| $\Delta pep-2$    | <i>pep-2</i> in-frame deletion mutant                                                                                                        | This study         |
|                   | <i>E. coli</i>                                                                                                                               |                    |
| JM109             | General cloning host; <i>recA1, endA1, gyrA96, thi-1, hsdR17, supE44, relA1, \Delta(lac-proAB)/F'[traD36, proAB+, lacIq, lacZ\Delta M15]</i> | Sangon Biotech Co. |
|                   | Plasmids                                                                                                                                     |                    |
| pRN5101           | Temperature-sensitive <i>E. coli-Bacillus</i> shuttle vector, <i>Ery<sup>R</sup></i>                                                         | Ding yan qin's Lab |
| pRDpep-1          | <i>pep-1</i> deletion vector based on pRN5101                                                                                                | This study         |
| pRDpep-2          | <i>pep-2</i> deletion vector based on pRN5101                                                                                                | This study         |

**Table S2.** Primers used in this study.

| Gene name/<br>Location     | Forward primer (5'-3')                                                                                       | Reverse primer (5'-3')                                                | Target                            |
|----------------------------|--------------------------------------------------------------------------------------------------------------|-----------------------------------------------------------------------|-----------------------------------|
|                            | Primers for gene knockout and validation                                                                     |                                                                       |                                   |
| Upstream of <i>pep-1</i>   | <i>pep-1</i> -up-F: CGGCCAC-GATGCGTCCGGCG-TAGAGGGCTTAC-CTAAGGCCGATATG                                        | <i>pep-1</i> -up-R: GTGCAGTT-GAAAGGTAAATCCG-TAAAGGGGAG                | In-frame deletion of <i>pep-1</i> |
| Downstream of <i>pep-1</i> | <i>pep-1</i> -down-F: TTTACGGAT-TTACCTTTCAACTGCACAA-GACC                                                     | <i>pep-1</i> -down-R: GACTGCG-CAAAAGACATAATCGATAAC-GACAACATTGCAGGTG   | In-frame deletion of <i>pep-1</i> |
| Upstream of <i>pep-2</i>   | <i>pep-2</i> -up-F: CGGCCAC-GATGCGTCCGGCGTAGAG-GACAGTATACGAATTGGGC                                           | <i>pep-2</i> -up-R: GATTTTTGTG-GAGCCCGTCAC-CAATTTATCTC                | In-frame deletion of <i>pep-2</i> |
| Downstream of <i>pep-2</i> | <i>pep-2</i> -down-F: AATTGGTGAC-GGGCTCCACAAAAATCCTC                                                         | <i>pep-2</i> -down-R: GACTGCGCAAAAAGA-CATAATCGATA-CAGATCCGATTGTCCATTC | In-frame deletion of <i>pep-2</i> |
|                            | RT-PCR primers used for determination of the organization of the <i>pep-1</i> and <i>pep-2</i> gene clusters |                                                                       |                                   |
| <i>pepM</i>                | <i>pepM</i> -F:                                                                                              | <i>manC</i> -R:                                                       | RT-PCR                            |
| <i>manC</i>                | GCGTCCGAATTAACA                                                                                              | CCCGTCACCAATTTATCTC                                                   | (Marked 1)*                       |
| <i>pepN</i>                | <i>pepN</i> -F:                                                                                              | <i>pepM</i> -R:                                                       | RT-PCR                            |
| <i>pepM</i>                | GGTTCGTGGACGCATTCA                                                                                           | AGCTCCGACTCCTCTTCTGT                                                  | (Marked 2)*                       |
| <i>manC</i>                | <i>manC</i> -F: TACGGAGGCGAA-                                                                                | <i>ugdH1</i> -R:                                                      | RT-PCR                            |
| <i>ugdH1</i>               | GAAAGCA                                                                                                      | TGAAAAAGGGGTTCGC                                                      | (Marked 3)*                       |
| GM004728                   | 4728-F: GACCAGCTT-                                                                                           | <i>pepN</i> -R:                                                       | RT-PCR                            |
| <i>pepN</i>                | GAACTGTCCGATGAG                                                                                              | ACGACAACATTGCAGGTG                                                    | (Marked 4)*                       |
| <i>ugdH1</i>               | <i>ugdH1</i> -F:                                                                                             | <i>pepJ</i> -R:                                                       | RT-PCR                            |
| <i>pepJ</i>                | TACCGCATCAGCCAAATCC                                                                                          | TGAAGGGTTGCTGCGTGT                                                    | (Marked 5)*                       |
| <i>pepJ</i>                | <i>pepJ</i> -F:                                                                                              | <i>pepH</i> -R:                                                       | RT-PCR                            |
| <i>pepH</i>                | GAACACCTCTTCCACCTG                                                                                           | CAACCTTTCTGGCTGCGA                                                    | (Marked 6)*                       |
| <i>pepH</i>                | <i>pepH</i> -F:                                                                                              | <i>pepF</i> -R:                                                       | RT-PCR                            |
| <i>pepF</i>                | TGGTCCCTCCACTGATAGCA                                                                                         | GGAGCCTAAACGATTGTGG                                                   | (Marked 7)*                       |
| <i>pepF</i>                | <i>pepF</i> -F:                                                                                              | <i>pepE</i> -R:                                                       | RT-PCR                            |
| <i>pepE</i>                | GCTTCCGCTTGAACATCTC                                                                                          | GGTCTGGGCATTGGTGAT                                                    | (Marked 8)*                       |

|                                                                      |                              |                                 |              |
|----------------------------------------------------------------------|------------------------------|---------------------------------|--------------|
| <i>pepE</i>                                                          | <i>pepE</i> -F:              | <i>pepC</i> -R:                 | RT-PCR       |
| <i>pepC</i>                                                          | GATAAACCCGACGAACGCC          | GTAGGCTTGATCGTCTT-              | (Marked 9)*  |
| <i>pepC</i>                                                          | <i>pepC</i> -F:              | GCTTCCG                         | RT-PCR       |
| <i>pepA</i>                                                          | CCGCTCAC-                    | <i>pepA</i> -R:                 | (Marked 10)* |
|                                                                      | TTCATTTCAGCTCCATC            | GGTCTTGGACATGCGG-               |              |
|                                                                      |                              | TATGGTG                         |              |
| qRT-PCR primers used for determination of <i>nif</i> gene expression |                              |                                 |              |
| <i>nifH</i>                                                          | <i>nifH</i> -F: AC-          | <i>nifH</i> -R: AACAGCCGGAATAC- | qRT-PCR      |
|                                                                      | CTGCCAGCTCTTCATACTC          | GGACC                           |              |
| <i>nifD</i>                                                          | <i>nifD</i> -F: TCATTCTGTAC- | <i>nifD</i> -R: CACCGCCGA-      | qRT-PCR      |
|                                                                      | GCTGTGAGG                    | TATTGTAGTCTC                    |              |
| <i>nifK</i>                                                          | <i>nifK</i> -F: GCGGA-       | <i>nifK</i> -R: GGCATCATAGCCTG- | qRT-PCR      |
|                                                                      | GATGATTGCGGTATG              | TAATATGTG                       |              |

\* The primers are used in the numbering areas of Figure 2A

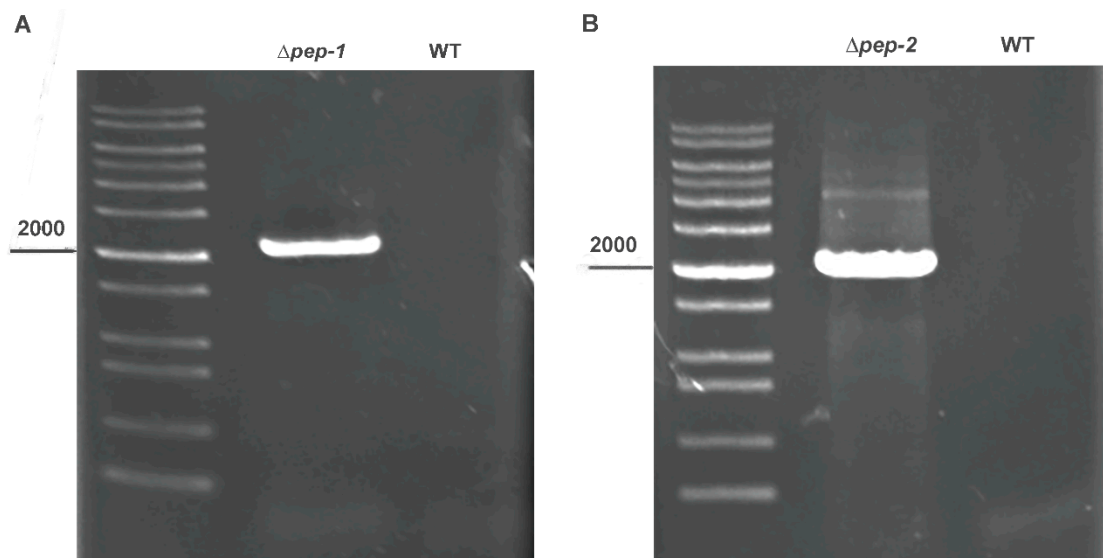

**Figure S1.** Identification of the knockout mutants ( $\Delta pep-1$  and  $\Delta pep-2$ ) by PCR. (A) Identification of the  $\Delta pep-1$  mutant. A 2072 bp DNA of fragment was obtained in  $\Delta pep-1$  mutant by PCR with primers *pep-1-up-F* and *pep-1-down-R*, but it was not observed in *P. polymyxa* WLY78. The special 2072 bp DNA fragment in  $\Delta pep-1$  mutant was produced in construction of this mutant by homologous recombination. For knockout of the *pep-1* cluster, about 1 kb upstream fragment flanking *ugdH2* was obtained by PCR with primers *pep-1-up-F* and *pep-1-up-R*, and 1 kb downstream fragment flanking *pepO* was obtained by PCR with primers *pep-1-down-F* and *pep-1-down-R*. Then, the two PCR fragments were used to make homologous recombination to get the  $\Delta pep-1$  mutant in which the 11 genes (*pepO-ugdH2*) with a length of 12.6 kb DNA were removed and the ~2 kb DNA fragment (about 1 kb upstream fragment and 1 kb downstream fragment) remained. (B) Identification of the  $\Delta pep-2$  mutant. A 2102 bp DNA fragment was obtained in the  $\Delta pep-2$  mutant by PCR with primers *pep-2-up-F* and *pep-2-down-R*. Then these PCR fragments were sequenced. The special 2102 bp DNA fragment in  $\Delta pep-2$  mutant was produced in construction of this mutant by homologous recombination. Similarly, for disruption of the *pep-2* cluster, about 1 kb upstream fragment flanking *manC* was obtained by PCR with primers *pep-2-up-F* and *pep-2-up-R* and 1 kb downstream fragment flanking *pepA* was obtained by PCR with primers *pep-2-down-F* and *pep-2-down-R* from the genomic DNA of *P. polymyxa* WLY78. The two PCR fragments were used to make homologous recombination to get the  $\Delta pep-2$  mutant in which the 15 genes (*pepA-manC*) with a length of 16.5 kb DNA were removed and the ~2 kb DNA fragment (about 1 kb upstream fragment and 1 kb downstream fragment) remained.

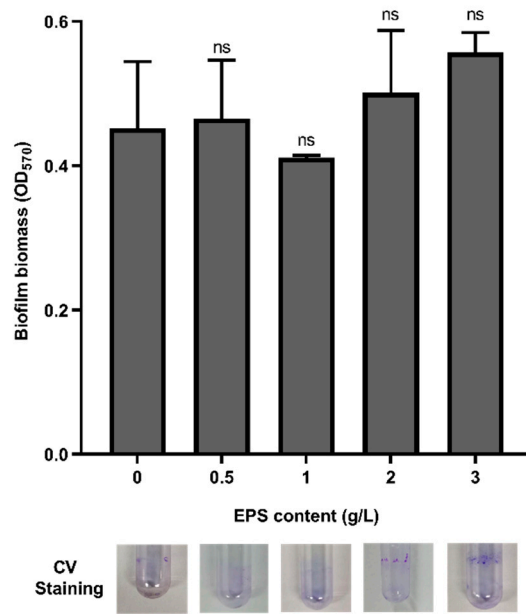

**Figure S2.** Impacts of exopolysaccharides (EPS) purified from *P. polymyxa* WLY78 on biofilm formation of the *pep-2* mutant. EPS was purified from *P. polymyxa* WLY78 and then different amounts (0-3 g/L) of the purified EPS were added to the liquid nitrogen-free medium supplemented with 20 mM NH<sub>4</sub>Cl. After cultivation for 96 h, biofilm formation was assayed by CV staining. The results show that the purified EPS from *P. polymyxa* WLY78 could not obviously enhance the biofilm biomass. Results are representative of at least three independent experiments. Error bars indicate SD. Ns indicates nonsignificant.
